# Supplementary material for: Networks of global bird invasion altered by regional trade ban
Source: PubMed Central journal article supplement — Sci Adv. 2017 Nov 22;3(11):e1700783. doi: 10.1126/sciadv.1700783 (PMC5699901; doi:10.1126/sciadv.1700783), 2017-11-22
Supplement: 1700783_SM.pdf [file 1700783_SM.pdf]

## Supplementary Materials for Networks of global bird invasion altered by regional trade ban

Luís Reino, Rui Figueira, Pedro Beja, Miguel B. Araújo, César Capinha, Diederik Strubbe

Published 22 November 2017, *Sci. Adv.* **3**, e1700783 (2017)

DOI: 10.1126/sciadv.1700783

### The PDF file includes:

- fig. S1. Highest-ranking trade volume/network structure parameters in the period 1995–2005.
- fig. S2. Highest-ranking trade volume/network structure parameters in the period 1995–2005.
- fig. S3. Histograms of network centrality measures in the period 1995–2005 versus 2006–2011.
- fig. S4. Global wild bird trade-driven invasion risk in the period 1995–2005.
- fig. S5. Global wild bird trade-driven invasion risk in the period 2006–2011.
- fig. S6. Trade fluxes of CITES-listed passerine birds in the period 1995–2005.
- fig. S7. Trade fluxes of CITES-listed Psittaciformes birds in the period 1995–2005.
- fig. S8. Discrepancies between exporter- and importer-listed quantities of traded wild birds.

### Other Supplementary Material for this manuscript includes the following:

(available at [advances.sciencemag.org/cgi/content/full/3/11/e1700783/DC1](http://advances.sciencemag.org/cgi/content/full/3/11/e1700783/DC1))

- table S1 (Microsoft Excel format). CITES bird trade data before and after the 2005 EU ban.
- table S2 (Microsoft Excel format). Overview of the 10 highest-ranked countries in terms of network centrality measures.
- table S3 (Microsoft Excel format). Overview of network parameter values per biogeographical region.
- table S4 (Microsoft Excel format). Birds annually exported to different biogeographical realms.

- table S5 (Microsoft Excel format). Birds annually exported from different biogeographical realms.
- table S6 (Microsoft Excel format). Invasion events of CITES-listed species before and after the 2005 EU ban.

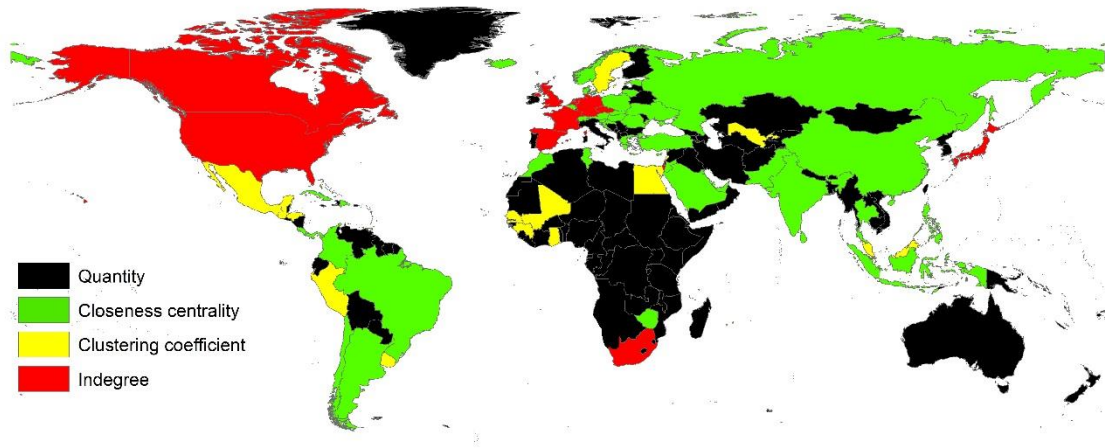

**fig. S1. Highest-ranking trade volume/network structure parameters in the period 1995–2005.** Country-level (standardized) network parameter values were first summed in order to identify the highest ranking parameter for each country. Before the ban, trade volume was the dominant invasion risk parameter for 59% of countries globally, followed by closeness centrality (27%), clustering coefficient (8%) and indegree (5%).

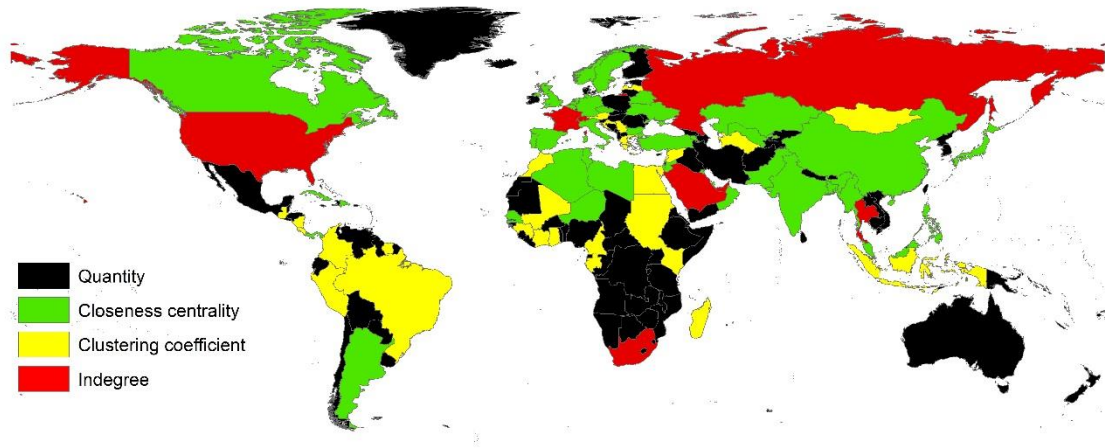

**fig. S2. Highest-ranking trade volume/network structure parameters in the period 1995–2005.** Country-level (standardized) network parameter values were first summed in order to identify the highest ranking parameter for each country. The EU bird trade ban reduced the importance of trade volume globally (to 47% of countries globally), and increased the contribution of network parameters for explaining invasion success (closeness centrality: 27%, clustering coefficient: 19%, indegree: 6%).

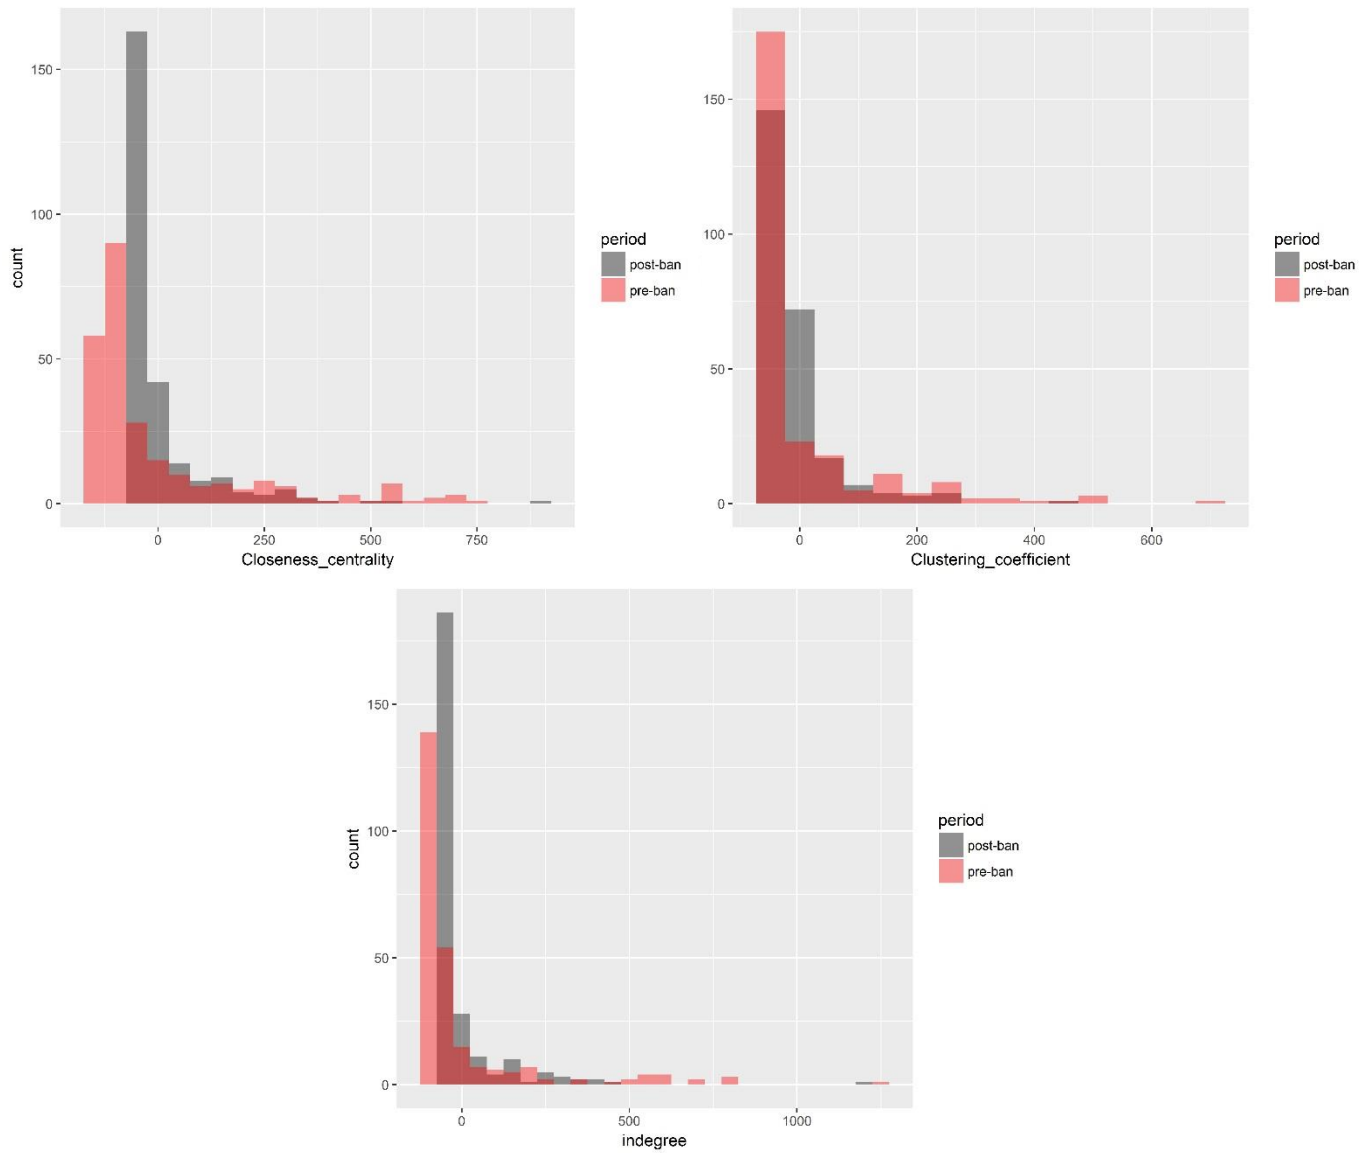

**fig. S3. Histograms of network centrality measures in the period 1995–2005 versus 2006–2011.** Closeness centrality values on average reduced to 21% of its pre-ban levels, the clustering coefficient to 19% and indegree to 18%.

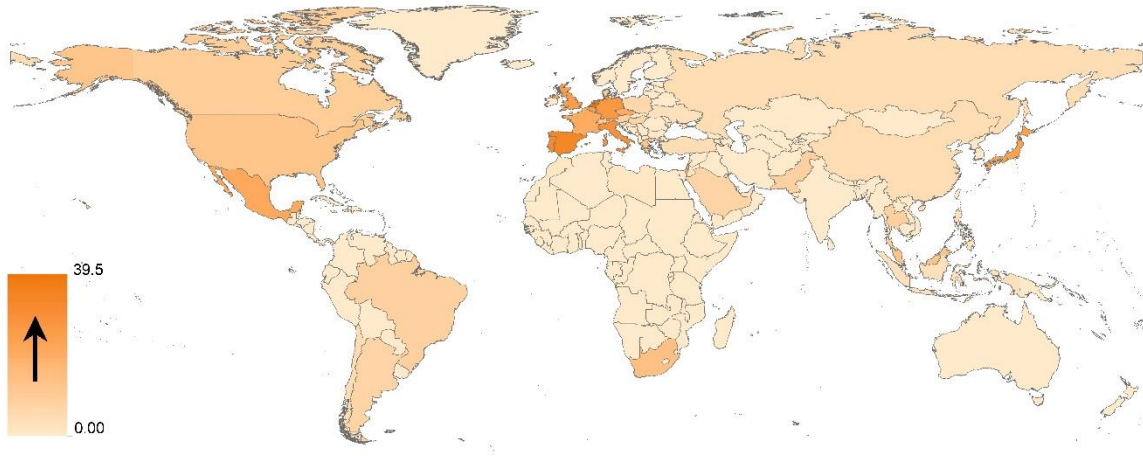

**fig. S4. Global wild bird trade-driven invasion risk in the period 1995–2005.** Country-level invasion risk estimates were obtained by summing model invasion probabilities for all bird species exported to a given country in the period 1995–2005. Darker hues indicate higher invasion probabilities, maps have been drawn using equally spaced intervals. Invasion risks were highest across (Western) Europe, followed by Japan, Mexico and South-Africa.

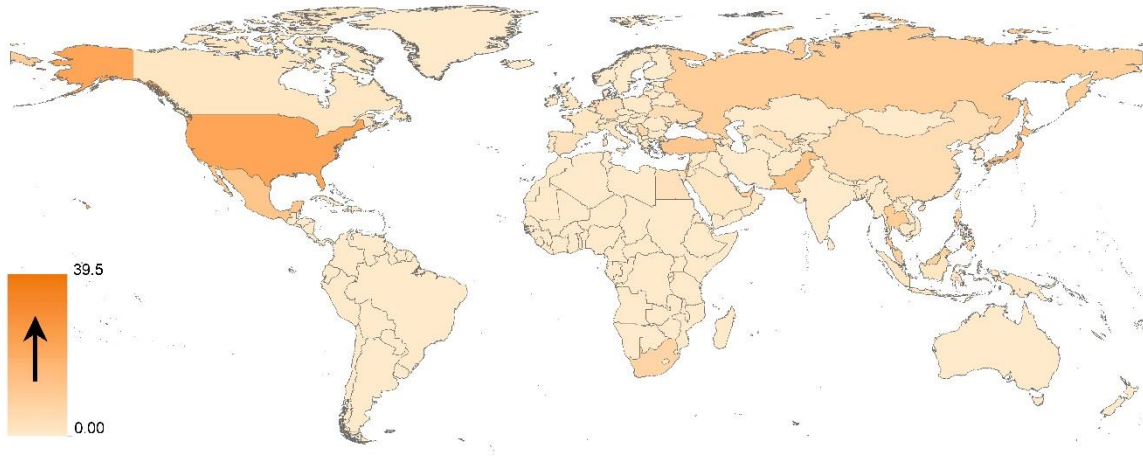

**fig. S5. Global wild bird trade–driven invasion risk in the period 2006–2011.** Country-level invasion risk estimates were obtained by summing model invasion probabilities for all bird species exported to a given country in the period 2006–2011. Darker hues indicate higher invasion probabilities, maps have been drawn using equally spaced intervals. Invasion risks were highest across the Nearctic, followed by parts of the Afro-Tropical and Indo-Malay region.

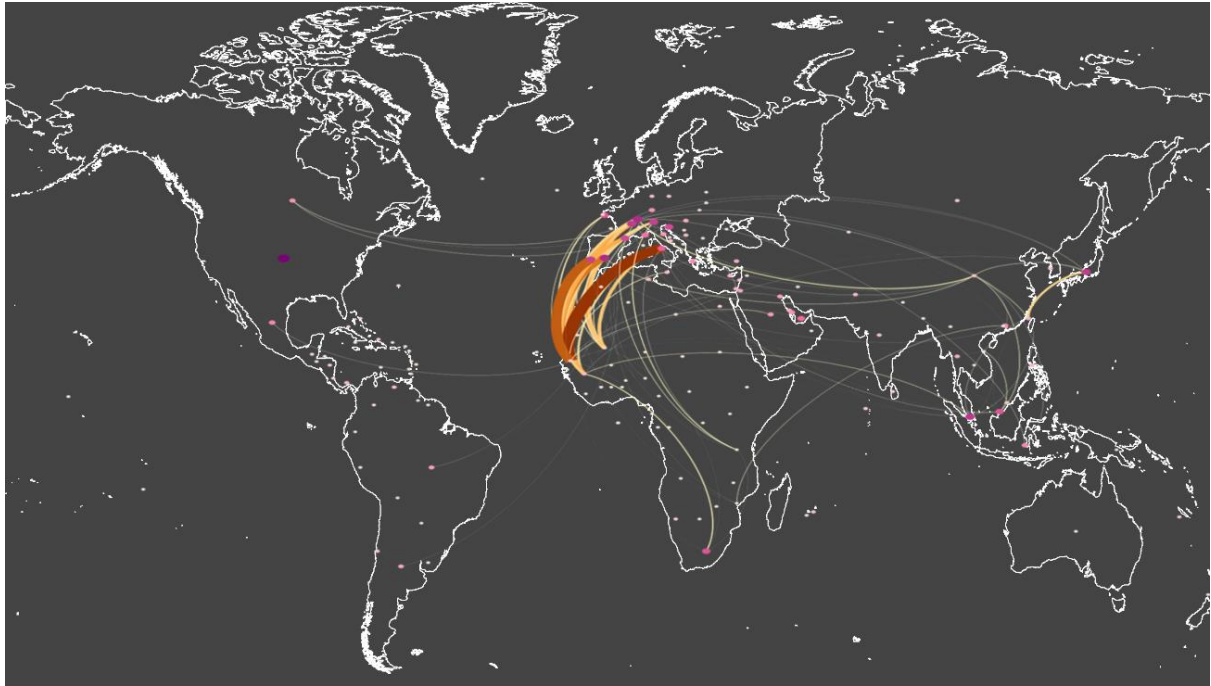

**fig. S6. Trade fluxes of CITES-listed passerine birds in the period 1995–2005.** Darker colours and broader lines indicate higher trade volumes.

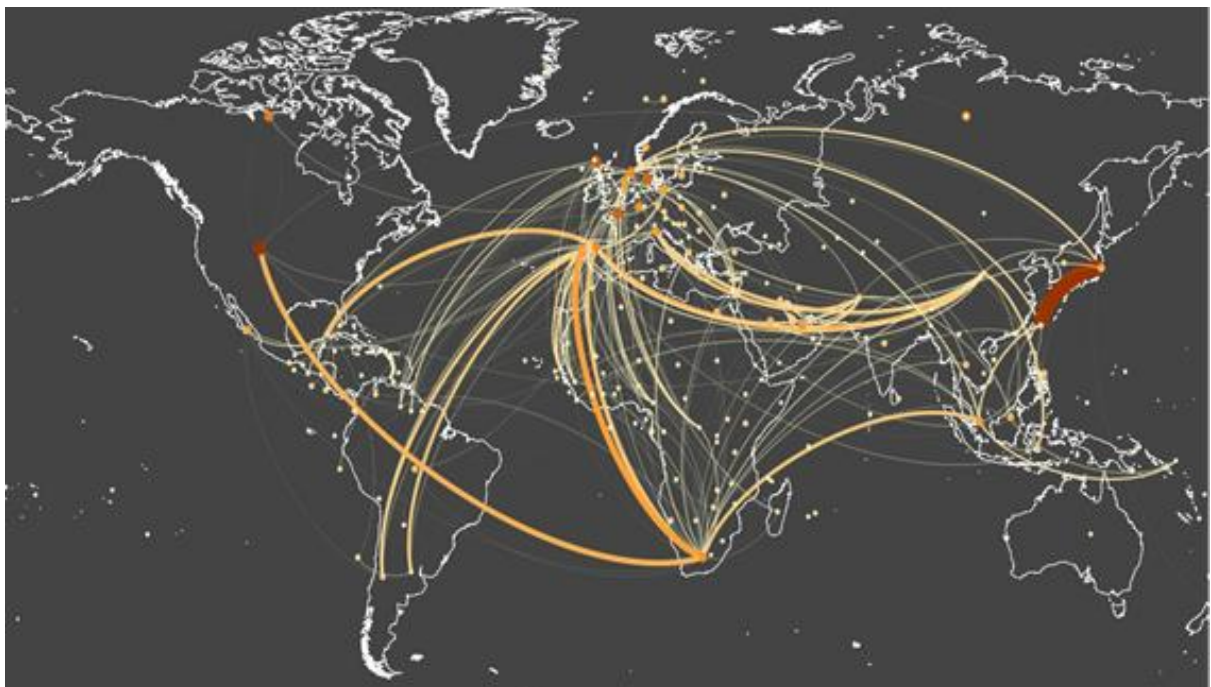

**fig. S7. Trade fluxes of CITES-listed Psittaciformes birds in the period 1995–2005.** Darker colours and broader lines indicate higher trade volumes.



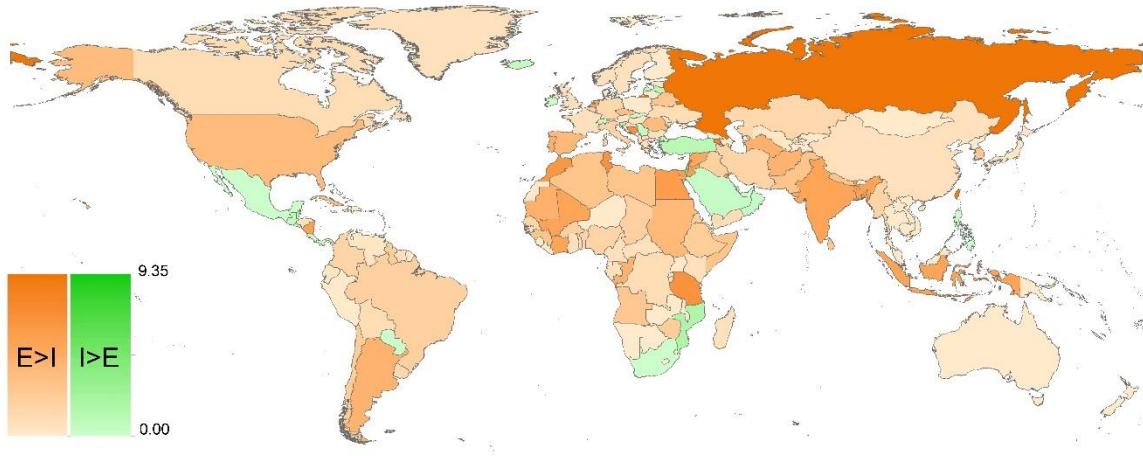

**fig. S8. Discrepancies between exporter- and importer-listed quantities of traded wild birds.** Orange hues indicate countries where listed exports to were higher than reported imports, green hues represent countries where listed imports where higher. Darker hues indicate higher invasion probabilities, maps have been drawn using equally spaced intervals. Orange hues thus represent countries where post-ban invasion risks may be overestimated, green hues indicate possible underestimates.
